# Supplementary material for: Comparative analysis of artificial intelligence algorithms for fine particulate matter prediction
Source: Research Square preprint supplement (doi:10.21203/rs.3.rs-7199213/v1), 2025-08-05
Supplement: Supplementary file 1 [file f00e2aaff729ecb636de0854.docx]

**Supplementary material**

**Section 1**

**Table 1** Description of study sites.

| Study site | Latitude | Longitude | Land use |
| --- | --- | --- | --- |
| Alta Córdoba | -31° 23’ 7.63” | -64° 11’ 2.52” | Urban |
| Casa Radical | -31° 25’ 12.65” | -64° 11’ 21.29” | Urban |
| Ciudad Universitaria | -31° 26’ 5.59” | -64° 11’ 36.66” | Urban |
| Ferreyra | -31° 27’ 8.71” | -64° 6’ 53.82” | Urban |
| La Reserva | -31° 21’ 54.81” | -64° 15’ 44.37” | Urban |
| Los Boulevares | -31° 20’ 14.47” | -64° 12’ 36.87” | Urban |
| Tablada Park | -31° 22’ 9.61” | -64° 13’ 19.16” | Urban |
| Juarez Celman | -31° 13’ 45.07” | -64° 9’ 43.32” | Agricultural |
| Río Ceballos | -31° 10’ 41.42” | -64° 19’ 18.74” | Agricultural |
| Campo Escuela | -31° 28’ 44.63” | -64° 0’ 22.09” | Agricultural |

a Notes: Study site, latitude, longitude, description.

**Table 2** Satellite data.

| Source | Dependency | Description | Spatial resolution | Temporal resolution | Variables [#] |
| --- | --- | --- | --- | --- | --- |
| ERA5 (ECMWF reanalysis) | ECMWF | Large number of atmospheric, land and oceanic climate variables | 0.25° x 0.25° | hourly | 164 |
| MODIS-MAIAC (MCD19A2) | NASA | Aerosol Optical Depth (AOD) | 0.1° × 0.1° | 3 hourly data per day | 1 |
| MERRA-2 (M2T1NXFLX) | NASA | Planet Boundary Layer (PBL) | 0.625° × 0.5° | hourly | 1 |
| MERRA-2 (M2IMNXGAS) | NASA | Aerosol Optical Depth (AOD) | 0.625° × 0.5° | hourly | 1 |
| MERRA-2 (SODA) | NASA | Meteorological variables | 0.625° × 0.5° | hourly | 9 |
| VIIRS (VNP14A1) | NASA | Fires and other thermal anomalies | 0.1° × 0.1° | daily | 1 |
| MODIS (MOD11A1/MYD11A1) | NASA | Land Surface Temperature (LST) | 0.1° × 0.1° | hourly | 1 |

a Notes: Data source, dependency, variable description, spatial resolution, temporal resolution and total number of downloaded variables.

b Source notes: ERA5 database by the European Centre for Medium-Range Weather Forecasts (ECMWF), MODIS Multi-Angle Implementation of Atmospheric Correction (MAIAC), Modern-Era Retrospective analysis for Research and Applications, Version 2 (MERRA-2) and Visible Infrared Imaging Radiometer Suite (VIIRS).

**Table 3** Average annual PM2.5 concentration at each study site.

| Study site | Concentration | Standard deviation | Land use |
| --- | --- | --- | --- |
| Tablada Park | 13.89 | ±12.72 | Urban |
| Casa Radical | 12.17 | ±10.27 | Urban |
| Ciudad Universitaria | 11.53 | ±10.71 | Urban |
| La Reserva | 10.33 | ±10.26 | Urban |
| Alta Córdoba | 9.08 | ±8.60 | Urban |
| Campo Escuela | 8.88 | ±9.22 | Agricultural |
| Río Ceballos | 6.40 | ±6.36 | Agricultural |
| Juarez Celman | 6.00 | ±6.88 | Agricultural |

a Notes: Study site; annual average PM2.5 concentration; estimated standard deviation.

**Table 4** Descriptive measures to compare the average time series for the different land uses.

| Summary statistic | Urban | Agricultural |
| --- | --- | --- |
| Mean | 13.10 | 6.78 |
| Standard deviation | 9.90 | 6.10 |
| Maximum | 95.28 | 47.02 |
| Minimum | 0.93 | 0.53 |
| 50th Percentile | 8.41 | 4.92 |
| 75th Percentile | 15.72 | 9.30 |
| 90th Percentile | 25.49 | 15.16 |
| 95th Percentile | 32.11 | 19.57 |
| IR | 7.31 | 4.38 |

a Notes: Interquartile range (IR).

**Section 2**

The reduced urban land use database consisted of a total of 76 variables, which are as follows: hour of the day, day of the week, month of the year, day of the month, season of the year, month of the year sine encoding, month of the year cosine encoding, day of the week sine encoding, day of the week cosine encoding, day of the month sine encoding, day of the month cosine encoding, hour of the day sine encoding, hour of the day cosine encoding, season of the year sine encoding, season of the year cosine encoding, neutral wind component v at 10 m (ERA5), 2 m temperature (ERA5), available potential convective energy (ERA5), convective rain rate (ERA5), surface tension of gravity wave eastward (ERA5), bare soil evaporation (ERA5), vegetation transpiration evaporation (ERA5), surface heat roughness logarithm forecast (ERA5), surface roughness forecast (ERA5), gravity wave dissipation (ERA5), high-level cloud cover (ERA5), instantaneous turbulent surface tension eastward (ERA5), instantaneous moisture flux (ERA5), mean runoff rate (ERA5), mean sea-level pressure (ERA5), mean subsurface runoff rate (ERA5), mean net surface longwave radiation (ERA5), mean vertically integrated moisture divergence (ERA5), mean cloud cover (ERA5), minimum vertical refractivity gradient within capture layer (ERA5), near-infrared albedo for diffuse radiation (ERA5), surface tension of gravity wave northward (ERA5), subsurface runoff (ERA5), net upward thermal radiation (ERA5), total cloud cover (ERA5), total ozone column (ERA5), total rainwater column (ERA5), total water vapor column (ERA5), total precipitation (ERA5), total totals index (ERA5), top height of capture layer (ERA5), vertically integrated frozen water flux divergence within cloud layer (ERA5), vertically integrated liquid water flux divergence within cloud layer (ERA5), vertically integrated geopotential flux divergence (ERA5), vertically integrated kinetic energy flux divergence (ERA5), vertically integrated mass flux divergence (ERA5), vertically integrated ozone flux divergence (ERA5), vertically integrated eastward frozen water cloud flux (ERA5), vertically integrated eastward liquid water cloud flux (ERA5), vertically integrated total energy flux eastward (ERA5), vertically integrated water vapor flux eastward (ERA5), vertically integrated northward frozen water cloud flux (ERA5), vertically integrated northward liquid water cloud flux (ERA5), vertically integrated kinetic energy flux northward (ERA5), vertically integrated ozone flux northward (ERA5), vertically integrated water vapor flux northward (ERA5), zero degree level (ERA5), neutral wind at 10 m (ERA5), 2 m relative humidity (ERA5), 2 m dew point temperature (ERA5), mean large-scale precipitation rate (ERA5), surface pressure (ERA5), clear sky (ERA5), direct solar radiation at the surface (ERA5), boundary layer height (ERA5), boundary layer dissipation (ERA5), aerosol optical depth (MERRA-2), aerosol optical depth increase (MERRA-2), aerosol optical depth increase (MODIS-MAIAC), atmospheric boundary layer height (MERRA-2), VNP14A1 001 fire mask (VIIRS), and land surface temperature (MODIS).

The reduced database for agricultural land use consisted of a total of 83 variables, which include the following: time of day, day of the week, month of the year, day of the month, season of the year, sine-coded month of the year, cosine-coded month of the year, sine-coded day of the week, cosine-coded day of the week, sine-coded day of the month, cosine-coded day of the month, sine-coded time of day, cosine-coded time of day, sine-coded season of the year, cosine-coded season of the year, component v of wind at 100 m (ERA5), component u of neutral wind at 10 m (ERA5), available convective potential energy (ERA5), convective rain rate (ERA5), eastward surface gravity wave stress (ERA5), vegetation transpiration evaporation (ERA5), predicted albedo (ERA5), predicted logarithm of surface heat roughness (ERA5), dissipation of gravity wave (ERA5), high cloud coverage (ERA5), maximum temperature at 2 m from previous post-processing (ERA5), mean evaporation rate (ERA5), mean large-scale precipitation rate (ERA5), northward surface gravity wave stress (ERA5), mean runoff rate (ERA5), mean sea-level pressure (ERA5), mean subsurface runoff rate (ERA5), mean net surface longwave radiation (ERA5), mean vertical refractivity gradient within trapping layer (ERA5), mean cloudiness (ERA5), precipitation type (ERA5), subsurface runoff (ERA5), mean surface latent heat flux (ERA5), mean surface sensible heat flux (ERA5), mean upper thermal radiation (ERA5), total cloudiness (ERA5), total column water (ERA5), total precipitation (ERA5), total totals index (ERA5), height of trapping layer base (ERA5), low vegetation type (ERA5), visible UV albedo for diffuse radiation (ERA5), vertical integral of frozen water flux divergence in cloud (ERA5), vertical integral of liquid water flux divergence in cloud (ERA5), vertical integral of kinetic energy flux divergence (ERA5), vertical integral of ozone flux divergence (ERA5), vertical integral of thermal energy flux divergence (ERA5), vertical integral of total energy flux divergence (ERA5), vertical integral of frozen water flux eastward (ERA5), vertical integral of liquid water flux eastward (ERA5), vertical integral of geopotential flux eastward (ERA5), vertical integral of ozone flux eastward (ERA5), vertical integral of water vapor flux eastward (ERA5), vertical integral of atmospheric mass (ERA5), vertical integral of mass tendency (ERA5), vertical integral of frozen water flux northward (ERA5), vertical integral of liquid water flux northward (ERA5), vertical integral of heat flux northward (ERA5), vertical integral of ozone flux northward (ERA5), vertical integral of water vapor flux northward (ERA5), vertical integral of temperature (ERA5), vertically integrated moisture divergence (ERA5), zero degree level (ERA5), neutral wind at 10 m (ERA5), temperature at 2 m (ERA5), relative humidity at 2 m (ERA5), dew point temperature at 2 m (ERA5), surface pressure (ERA5), clear-sky direct solar radiation at the surface (ERA5), planetary boundary layer height (ERA5), instantaneous moisture flux (ERA5), boundary layer height (ERA5), boundary layer dissipation (ERA5), aerosol optical depth (MERRA-2), aerosol optical depth increment (MERRA-2), aerosol optical depth increment (MODIS-MAIAC), atmospheric boundary layer height (MERRA-2), fire mask VNP14A1 001 (VIIRS), and land surface temperature (MODIS).

**Section 3**

**Table 1** Hyperparameters for the urban land use algorithms.

| Model | Source | Hyperparameter | Value |
| --- | --- | --- | --- |
| LightGBM | lightgbm | n_estimators | 350 |
|  |  | learning_rate | 0.112 |
|  |  | num_leaves | 300 |
|  |  | max_depth | 12 |
|  |  | min_data_in_leaf | 400 |
|  |  | lambda_l1 | 6 |
|  |  | lambda_l2 | 6 |
|  |  | min_gain_to_split | 0.010 |
|  |  | bagging_fraction | 0.8 |
|  |  | bagging_freq | 40 |
|  |  | feature_fraction | 0.600 |
| XGBoost | xgboost | max_depth | 8 |
|  |  | learning_rate | 0.681 |
|  |  | n_estimators | 571 |
|  |  | min_child_weight | 8 |
|  |  | gamma | 0.968 |
|  |  | subsample | 0.703 |
|  |  | colsample_bytree | 0.687 |
|  |  | reg_alpha | 0.865 |
|  |  | reg_lambda | 0.654 |
| K-Nearest Neighbors | sklearn | n_neighbors | 7 |
|  |  | weights | uniform |
|  |  | algorithm | ball tree |
|  |  | p | 1 |
|  |  | leaf_size | 95 |
| Support Vector Regressor | sklearn | epsilon | 0.9 |
|  |  | C | 2 |
| Random Forest Regressor | sklearn | n_estimators | 150 |
|  |  | max_depth | 48 |
|  |  | min_samples_leaf | 50 |
|  |  | min_samples_split | 92 |
|  |  | max_features | 10 |
| SGD Regressor | sklearn | alpha | 0.598 |
|  |  | l1_ratio | 0.5 |
| Ridge Regression | sklearn | alpha | 0.184 |
| ElasticNet Regression |  | alpha | 0.507 |
|  |  | l1_ratio | 0.2 |
| Lasso Regression | sklearn | alpha | 0.437 |
| LSTM | tensorflow | Units first layer | 200 |
|  |  | Units second layer | 100 |
|  |  | Units third layer | 100 |
|  |  | Units fourth layer | 100 |
|  |  | Units fifth layer | 100 |
| GRU | tensorflow | Units first layer | 200 |
|  |  | Units second layer | 100 |
|  |  | Units third layer | 100 |
|  |  | Units fourth layer | 100 |
| RNN | tensorflow | Units first layer | 200 |
|  |  | Units second layer | 100 |
|  |  | Units third layer | 100 |

a Notes: Modelling method, library/package/source of the algorithm, hyperparameter name and hyperparameter value.

**Table 2** Hyperparemters for the agricultural land use algorithms.

| Model | Source | Hyperparameter | Value |
| --- | --- | --- | --- |
| LightGBM | lightgbm | n_estimators | 310 |
|  |  | learning_rate | 0.108 |
|  |  | num_leaves | 220 |
|  |  | max_depth | 9 |
|  |  | min_data_in_leaf | 300 |
|  |  | lambda_l1 | 2 |
|  |  | lambda_l2 | 5 |
|  |  | min_gain_to_split | 0.008 |
|  |  | bagging_fraction | 0.8 |
|  |  | bagging_freq | 40 |
|  |  | feature_fraction | 0.400 |
| XGBoost | xgboost | max_depth | % |
|  |  | learning_rate | 0.184 |
|  |  | n_estimators | 301 |
|  |  | min_child_weight | 3 |
|  |  | gamma | 0.034 |
|  |  | subsample | 0.773 |
|  |  | colsample_bytree | 0.608 |
|  |  | reg_alpha | 0.595 |
|  |  | reg_lambda | 0.373 |
| K-Nearest Neighbors | sklearn | n_neighbors | 8 |
|  |  | weights | uniform |
|  |  | algorithm | auto |
|  |  | p | 1 |
|  |  | leaf_size | 50 |
| Support Vector Regressor | sklearn | epsilon | 0.2 |
|  |  | C | 3 |
| Random Forest Regressor | sklearn | n_estimators | 500 |
|  |  | max_depth | 40 |
|  |  | min_samples_leaf | 50 |
|  |  | min_samples_split | 32 |
|  |  | max_features | 10 |
| SGD Regressor | sklearn | alpha | 0.341 |
|  |  | l1_ratio | 1.0 |
| Ridge Regression | sklearn | alpha | 0.291 |
| ElasticNet Regression |  | alpha | 0.470 |
|  |  | l1_ratio | 0.8 |
| Lasso Regression | sklearn | alpha | 0.236 |
| LSTM | tensorflow | Units first layer | 200 |
|  |  | Units second layer | 100 |
|  |  | Units third layer | 100 |
|  |  | Units fourth layer | 100 |
| GRU | tensorflow | Units first layer | 200 |
|  |  | Units second layer | 100 |
|  |  | Units third layer | 100 |
| RNN | tensorflow | Units first layer | 200 |
|  |  | Units second layer | 100 |
|  |  | Units third layer | 100 |
|  |  | Units fourth layer | 100 |

a Notes: Modelling method, library/package/source of the algorithm, hyperparameter name and hyperparameter value.
